# Supplementary material for: Co-delivery of D-(KLAKLAK)2 Peptide and Chlorin e6 using a Liposomal Complex for Synergistic Cancer Therapy
Source: MDPI journal article supplement (doi:10.3390/pharmaceutics11060293), 2019-06-21
Supplement: s1 [file s1]

# Supplementary Materials: Co-delivery of D-(KLAKLAK)<sub>2</sub> Peptide and Chlorin e6 using a Liposomal Complex for Synergistic Cancer Therapy

Chaemin Lim, Jin Kook Kang, Woong Roek Won, June Yong Park, Sang Myung Han, Thi ngoc Le, Jae Chang Kim, Jaewon Her, Yuseon Shin and Kyung Taek Oh

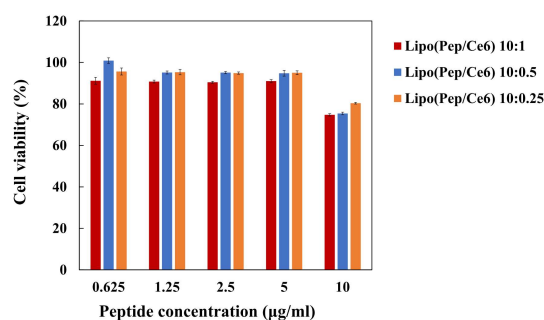

**Figure S1.** The cell viability of KB cells treated with Lipo (Pep, Ce6) at different drug loading ratio.
